# Supplementary material for: Synthesis, cytotoxicity and bioimaging of a novel Hg2+ selective fluorogenic chemosensor
Source: Royal Society of Chemistry journal article supplement (doi:10.1039/c4ay00314d), 2014-01-01
Supplement: c4ay00314d1.pdf [file c4ay00314d1.pdf]

## Supporting information

### Synthesis, cytotoxicity and bioimaging of novel Hg<sup>2+</sup> selective fluorogenic chemosensor

Muhammad Saleem<sup>a</sup>, Razack Abdullah<sup>a</sup>, Anser Ali<sup>b</sup>, Bong Joo Park<sup>b</sup>, Eun Ha Choi<sup>b</sup>, In Seok Hong<sup>a</sup>, Ki Hwan Lee<sup>a,\*</sup>

<sup>a</sup>Department of Chemistry, Kongju National University, Gongju, Chungnam 314-701, Republic of Korea

<sup>b</sup>Department of Plasma Bioscience and display, Kwangwoon University, 20 Kwangwoon-gil, Nowon-gu, Seoul 139-701, Republic of Korea

\*corresponding author. Fax: +82-41-856-8613; E-mail address: [khlee@kongju.ac.kr](mailto:khlee@kongju.ac.kr)

### Index

| S. No.    | Figure title                                                                                                                    | Page No. |
|-----------|---------------------------------------------------------------------------------------------------------------------------------|----------|
| Figure S1 | <sup>1</sup> H NMR Spectrum of ligand <b>2</b> in DMSO- <i>d</i> <sub>6</sub> .                                                 | 1        |
| Figure S2 | <sup>13</sup> C NMR Spectrum of ligand <b>2</b> in DMSO- <i>d</i> <sub>6</sub> .                                                | 2        |
| Figure S3 | <sup>1</sup> H NMR Spectrum of ligand <b>2</b> + Hg <sup>2+</sup> in DMSO- <i>d</i> <sub>6</sub> .                              | 2        |
| Figure S4 | <sup>1</sup> H NMR Spectrum of ligand <b>2</b> + Hg <sup>2+</sup> with different concentration in DMSO- <i>d</i> <sub>6</sub> . | 3        |
| Figure S5 | FT-IR Spectrum of ligand <b>2</b> .                                                                                             | 4        |
| Figure S6 | FT-IR spectrum of ligand <b>2</b> + Hg <sup>2+</sup> .                                                                          | 4        |
| Figure S7 | Mass spectrum of ligand <b>2</b> .                                                                                              | 5        |
| Figure S8 | Mass spectrum of ligand-mercury complex.                                                                                        | 5        |
| Figure S9 | Colorimetric change of ligand <b>2</b> solution after addition of mercury ion and various ions under ambient light.             | 6        |

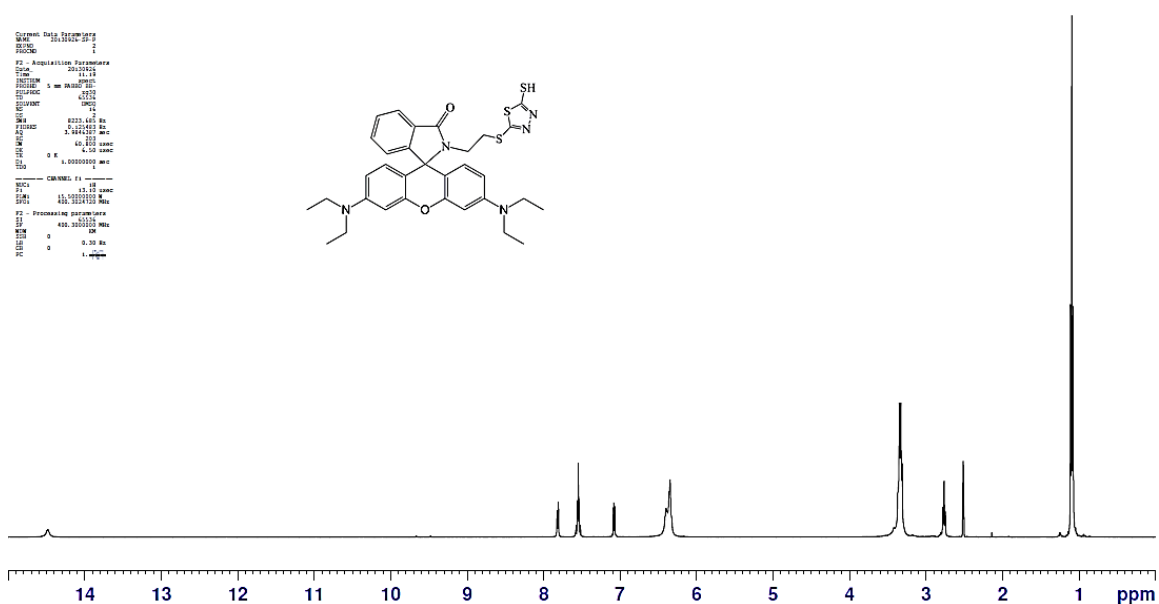

Figure S1: <sup>1</sup>H NMR Spectrum of ligand in DMSO-*d*<sub>6</sub>.

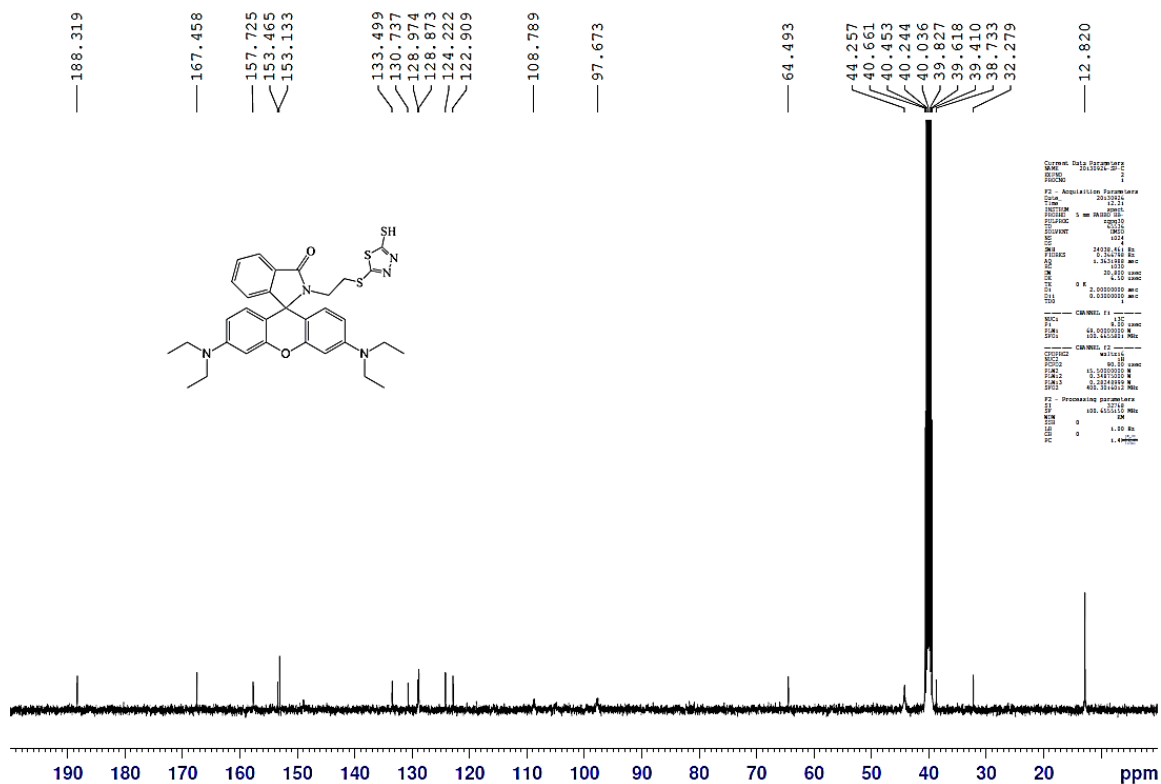

**Figure S2:** <sup>13</sup>C NMR Spectrum of ligand in DMSO-*d*<sub>6</sub>.

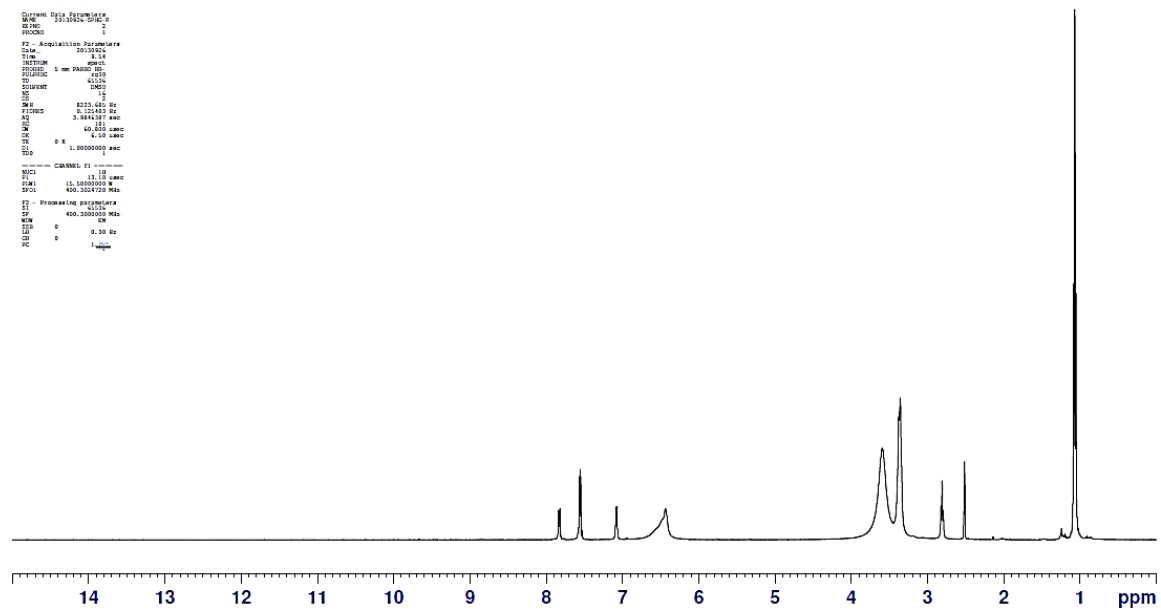

**Figure S3:** <sup>1</sup>H NMR Spectrum of ligand + Hg<sup>2+</sup> in DMSO-*d*<sub>6</sub>.

**Ligand**

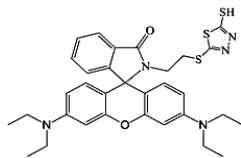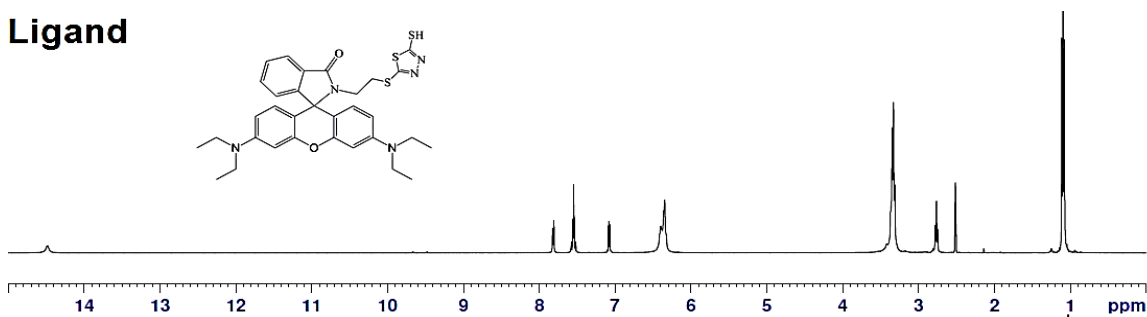

**Ligand + 1 eq. Hg<sup>2+</sup>**

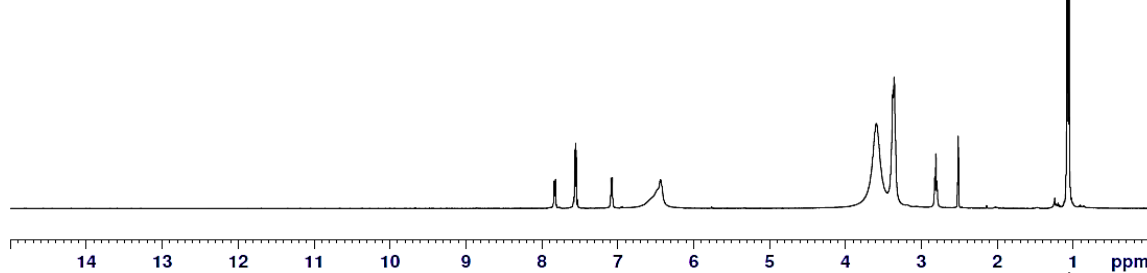

**Ligand + 2 eq. Hg<sup>2+</sup>**

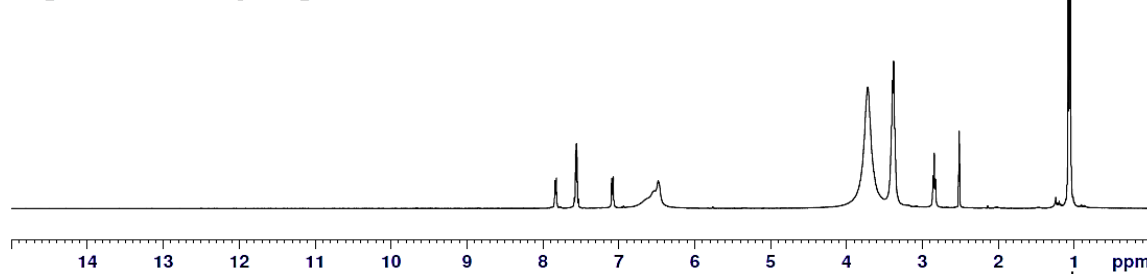

**Ligand + 3 eq. Hg<sup>2+</sup>**

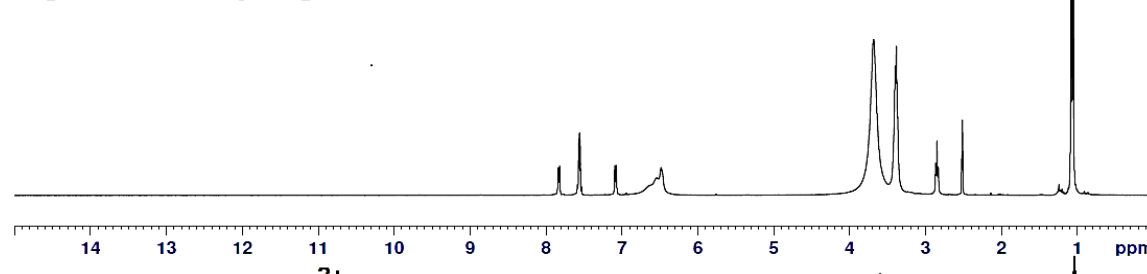

**Ligand + 4 eq. Hg<sup>2+</sup>**

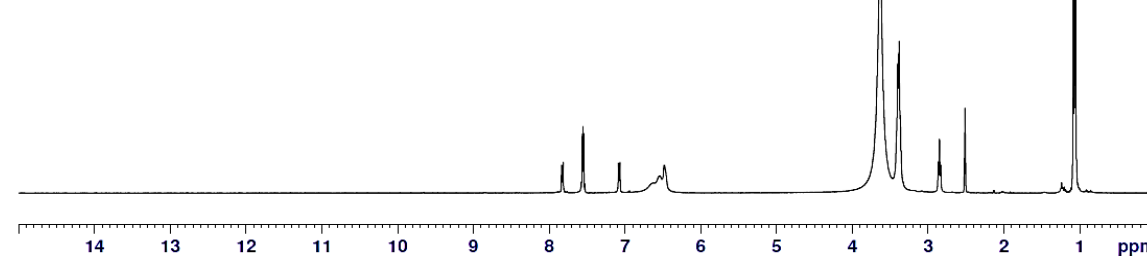

**Figure S4:** <sup>1</sup>H NMR Spectrum of ligand + Hg<sup>2+</sup> in DMSO-*d*<sub>6</sub>.

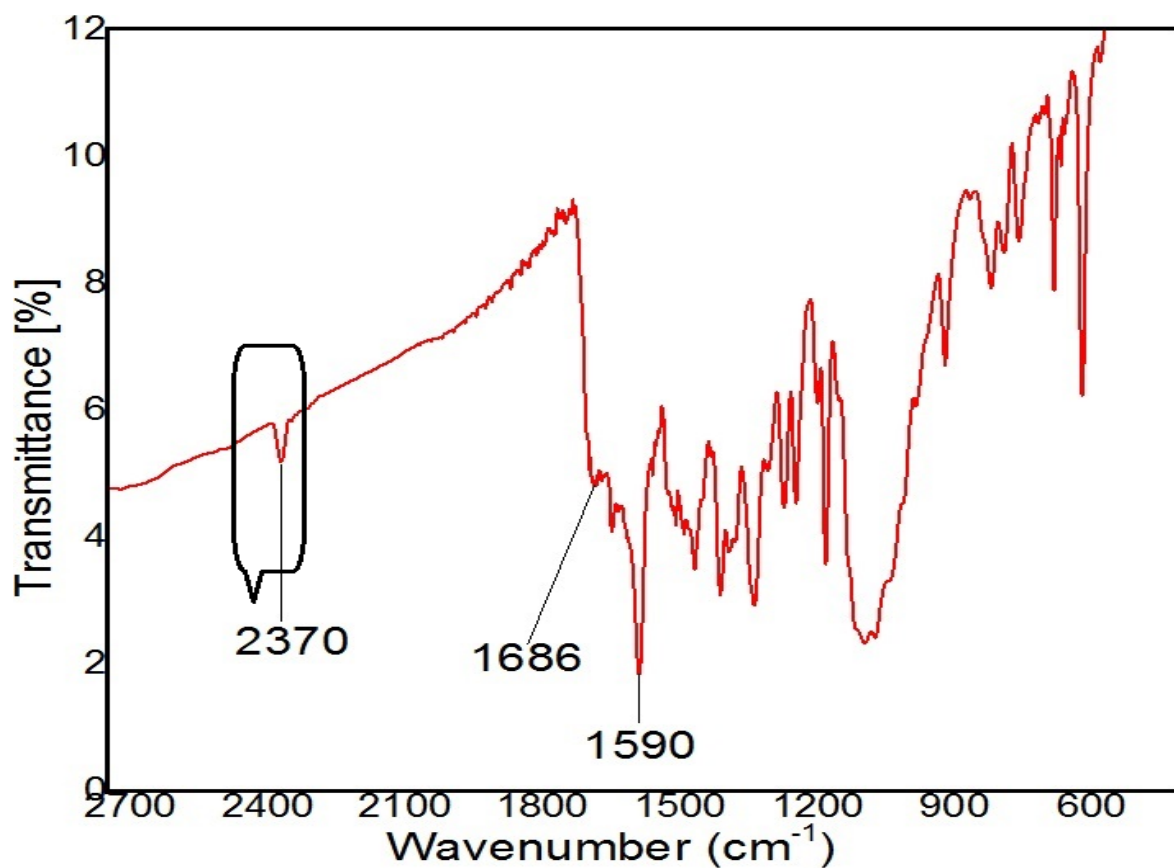

Figure S5: FT-IR Spectrum of ligand 2.

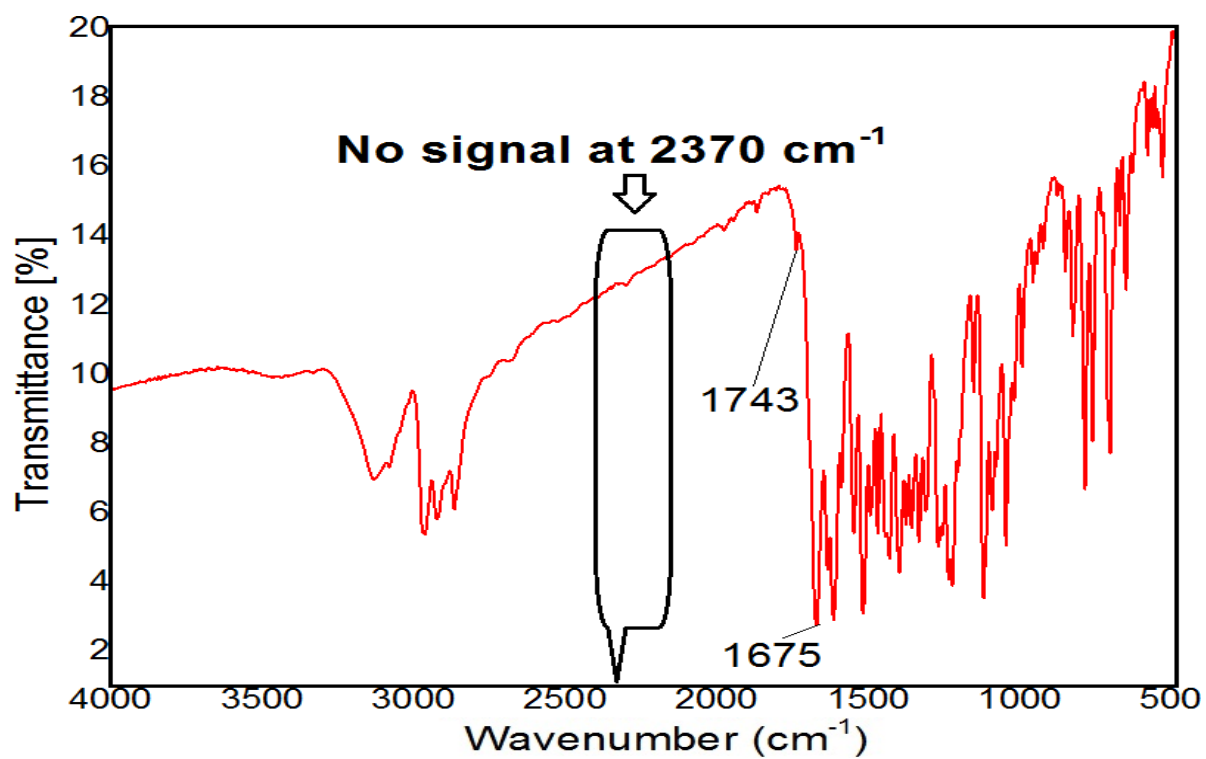

Figure S6: FT-IR spectrum of ligand +  $\text{Hg}^{2+}$ .

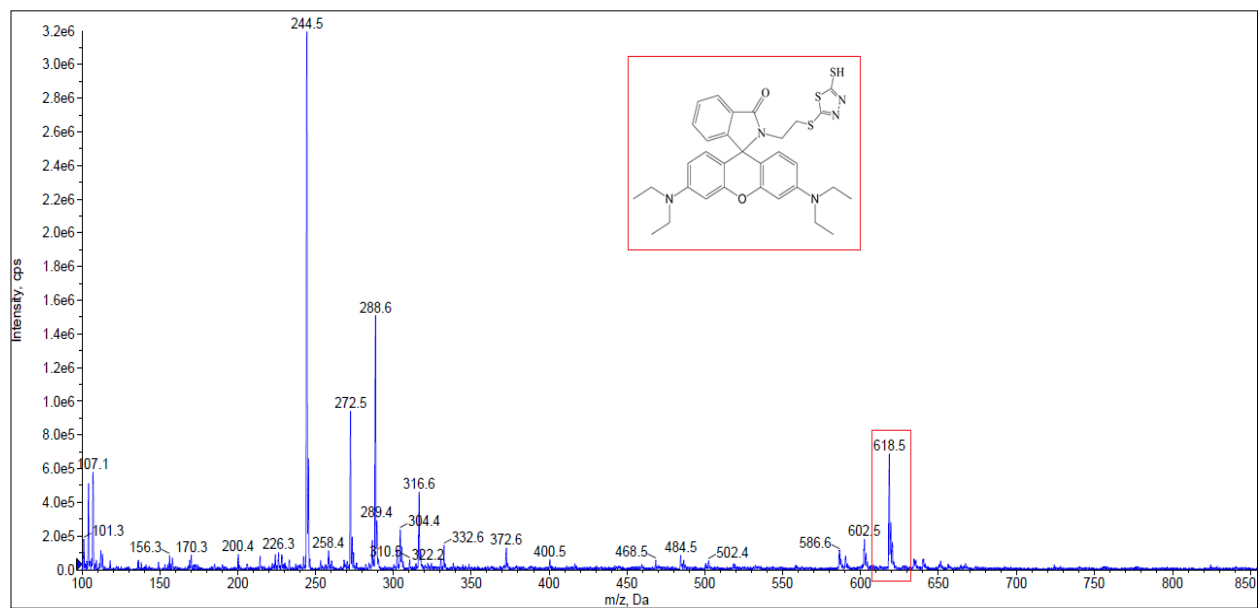

**Figure S7:** Mass spectrum of ligand.

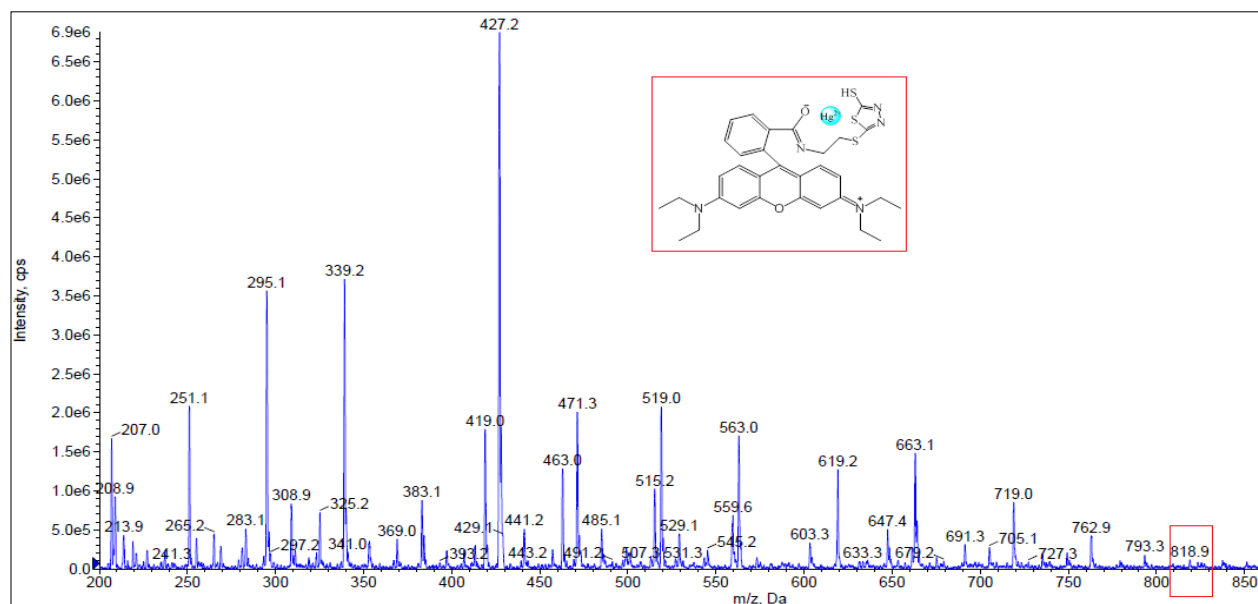

**Figure S8:** Mass spectrum of ligand-mercury complex.

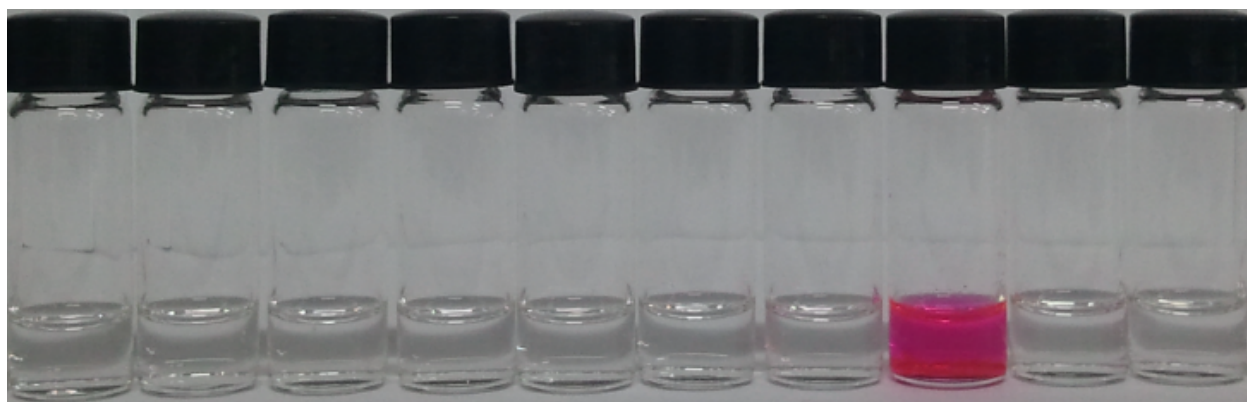

**Figure S9:** Colorimetric change of ligand **2** solution after addition of mercuric ion and various ions under ambient light.
